# Supplementary material for: Scanning tunneling microscopy investigations of unoccupied surface states in two-dimensional semiconducting β-√3 × √3-Bi/Si(111) surface
Source: Royal Society of Chemistry journal article supplement (doi:10.1039/c8cp01356j), 2018-01-01
Supplement: c8cp01356j1.pdf [file c8cp01356j1.pdf]

## Scanning tunneling microscopy investigations of unoccupied surface states in two-dimensional semiconducting $\beta\text{-}\sqrt{3}\times\sqrt{3}\text{-Bi/Si(111)}$ surface

Jian Gou,<sup>a,b</sup> Long-Juan Kong,<sup>a,b</sup> Wen-Bin Li,<sup>a,b</sup> Shao-Xiang Sheng,<sup>a,b</sup> Hui Li,<sup>c</sup> Sheng Meng,<sup>a,b</sup> Peng Cheng,<sup>a,b</sup> Ke-Hui Wu<sup>\*a,b,d</sup> and Lan Chen<sup>\*a,b</sup>

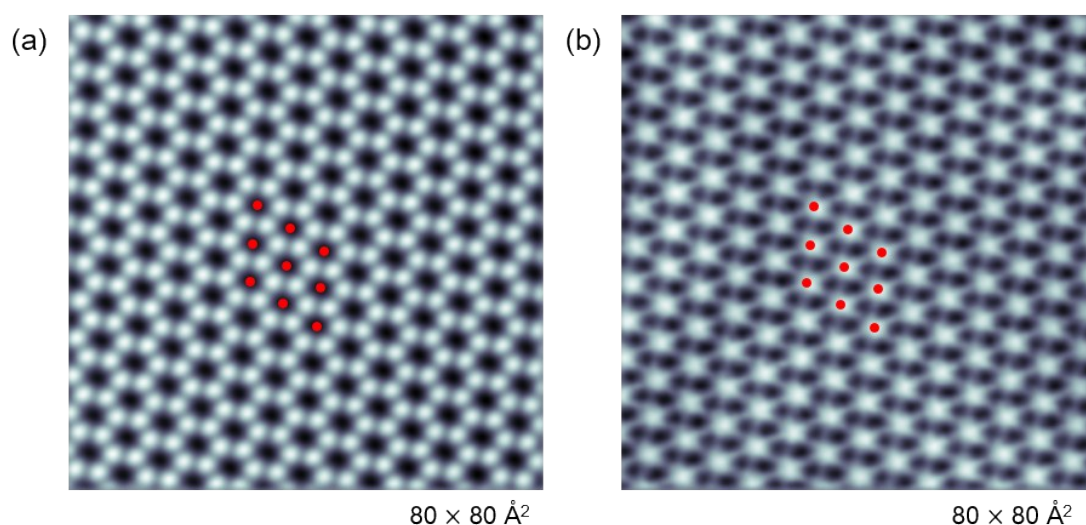

Fig. S1 STM topography image (a) and STS image (b) taken at the same place on unoccupied state indicate that the lowest surface state derive from surface Bi trimers (Red balls label the same trimer locations in (a) and (b)), Setpoint:  $V_{\text{tip}} = -1.15 \text{ V}$ ,  $I = 0.25 \text{ nA}$ .
